# Supplementary material for: Process evaluation of the Data-driven Quality Improvement in Primary Care (DQIP) trial: case study evaluation of adoption and maintenance of a complex intervention to reduce high-risk primary care prescribing
Source: PubMed Central journal article supplement — BMJ Open. 2017 Mar 10;7(3):e015281. doi: 10.1136/bmjopen-2016-015281 (PMC5353272; doi:10.1136/bmjopen-2016-015281), 2017-03-10
Supplement: bmjopen-2016-015281supp_appendix.pdf [file bmjopen-2016-015281supp_appendix.pdf]

## **GP topic guide (1).**

### **Interview one topic guide; Adoption/initial delivery questions**

What do you think of the intervention?

Are these views shared across the practice?

How does DQIP compare to other prescribing improvement work?

How does DQIP differ to other prescribing improvement work?

*Have they anchored their experience of DQIP to other work they have done? (Internalisation)*

What attracted the practice to taking part in the DQIP trial?

Can you tell me the process by which the practice decided to take part?

*Was the decision to take part mostly driven by one or two enthusiasts, or was it a more communal decision?*

Did you or another partner inform and persuade the other GPs in the practice to take part?

Did the practice have any concerns about the data extraction from the practice system? *Look for them talk about the benefits of patient level data, targeted medication review.*

How did the practice decide how to go about organising the DQIP work?

Can you tell me how the practice is using the tool? What is the practice system or process for using the tool?

Is this how you started using the tool, or has this process evolved slightly?

How has the practice incorporated the intervention into existing systems of work?

Were there any barriers to implementation? How have these been overcome?

What practical steps or resources were needed for implementation?

How often are you personally using the tool?

How often do you do the reviewing?

Have other members of staff used the tool? What is their role and how did they use it? *Did the whole practice buy into the tool?*

Have you had to call many patients into the practice?

Have you told patients you are taking part in a trial?

How have you explained the medication changes to patients?

Have you had any communication with the CHP or HB about DQIP?

How have patients responded to the intervention?

(Have patients whose NSAIDs were stopped come back? How commonly does this happen?)

Have you seen any impact on patients? On patient outcomes?

Has your prescribing changed as a result of DQIP?

Can you potentially show the GPs their data, or ask them to discuss the pattern of data they see.

Can you please tell me about a situation where you have used the tool and/or intervention? (*Get them to give at least one scenario, identify purpose, try and get a range of scenarios if possible*)

What did you think of the initial practice visit?

Was it helpful? How could it have been more helpful?

What did you think of the educational material?

Did the payment structure make any difference to your decision to take part?

Has the payment per review completed influenced the way in which you organised or delivered the reviews?

What do you like or not like about the tool?

Have you experienced any problems?

How have these been overcome?

Have you modified any of the work associated with DQIP?

Where there any contextual factors which impeded implementation of the tool?

Where there any contextual factors which facilitated implementation of the tool?

## **GP topic guide (2).**

### **Interview two topic guide; delivery/maintenance/sustainability questions**

What did you think of the intervention as a whole; education, informatics and financial incentive?  
Were these views shared across the practice?

Can you tell me how the practice used the tool? What was the practice system or process for using the tool? Did this change over time?

What practical steps or resources were needed to maintain use of the intervention?

How often did you personally use the tool? Did this change over time?

Did your experience of the tool/intervention change over time?

Were there other members of staff using the tool? Did they maintain use?

How did you communicate as a practice about the intervention/tool?

Did you collectively look at the run charts to monitor prescribing?

Have you ever made collective judgements about the effectiveness and utility of DQIP?

#### *Look for formal and informal judgements*

Have you modified the DQIP work or modified any practice processes or systems as a result of DQIP?

What did you think of the educational material? Did you use it regularly?

Can you please give me an example of when you used the educational material?

Can you please tell me about a positive situation using the tool?

Can you please tell me about a less desirable situation using the tool?

Is use of the tool and/or intervention sustainable in the long-term?

Where there any contextual factors which have impacted on use of the tool?

Where there any contextual factors which facilitated use of the tool?

How do you think the tool has impacted on patient outcomes?

Are there any resources which could have been put in place to improve patient outcomes?
